# Supplementary material
Source: Elsevier journal article supplement (https://www.sciencedirect.com/science/article/pii/S2444883417300360)
Supplement: mmc1 [file S2444883417300360:mmc1.pdf]

Table Appendix I. Data extraction

| Authors                              | Type of work | Topics                                                                                                                                                                                                                                                                                                     |            |     |     |     |     |     | Country Population |                                                                                                     |
|--------------------------------------|--------------|------------------------------------------------------------------------------------------------------------------------------------------------------------------------------------------------------------------------------------------------------------------------------------------------------------|------------|-----|-----|-----|-----|-----|--------------------|-----------------------------------------------------------------------------------------------------|
|                                      |              | Objectives *                                                                                                                                                                                                                                                                                               | Categories |     |     |     |     |     |                    |                                                                                                     |
|                                      |              |                                                                                                                                                                                                                                                                                                            | (1)        | (2) | (3) | (4) | (5) | (6) | (7)                |                                                                                                     |
| Alexander (1971)                     | Exploratory  | To suggest a method of image assessment.                                                                                                                                                                                                                                                                   |            | *   |     |     |     |     |                    | USA Students                                                                                        |
| Reid (1973)                          | Exploratory  | To investigate, by the use of repertory grid techniques, the components of the images which sixth formers had of universities, and to explore how these related to particular universities or types of university.                                                                                         | *          |     |     |     | *   |     |                    | United Kingdom Prospective students                                                                 |
| Krampf and Heinlein (1981)           | Exploratory  | To identify the key factors in the evaluation and perception of the university by prospective students and to determine the variables that could be modified so as to improve its image and increase matriculation.                                                                                        | *          |     |     |     |     |     |                    | USA Prospective students                                                                            |
| Davies and Melchiori (1982)          | Prescriptive | To propose a series of frameworks to assist institutional administrators to locate where they actually stand in the field of image and reputation development, and try to develop perspectives on whether existing styles of operation are appropriate for their particular circumstances.                 |            |     |     |     |     | *   |                    | -<br>-                                                                                              |
| Cochran and Hengstler (1983)         | Prescriptive | To outline the methods that may be followed to determine the relative position which the university occupies within the community and among potential students once the institution's goals are clear.                                                                                                     |            |     |     |     |     | *   |                    | -<br>-                                                                                              |
| Struckman-Johnson and Kinsley (1985) | Descriptive  | To describe how the Administration of the University of South Dakota assessed institutional image using the profile technique and considering the perspective of high school seniors, current university students and university alumni.                                                                   |            |     |     |     | *   |     | *                  | USA Students                                                                                        |
| Townsend (1986)                      | Exploratory  | To determine the preferences of one state's community college faculty and administrators for the four possible institutional directions and seven different images and to explore possible relationships between administrative/faculty preferences and certain demographic characteristics of each group. |            |     |     |     | *   |     |                    | USA Faculty and university managers                                                                 |
| Milo, Edson, and Mceuen (1989)       | Predictive   | To examine the effects of negative publicity on the image and reputation of a school and on prospective student's choice of college.                                                                                                                                                                       |            |     | *   |     |     |     |                    | USA Prospective students                                                                            |
| Weissman (1990)                      | Prescriptive | To describe a process for evaluating and modifying image, geared to Higher Education institutions.                                                                                                                                                                                                         |            |     |     |     |     | *   |                    | -<br>-                                                                                              |
| Bardo, Ross, and Headley (1990)      | Exploratory  | To develop and apply an image measurement instrument for university institutions that meets psychometric criteria.                                                                                                                                                                                         | *          |     |     |     |     |     |                    | USA Graduates                                                                                       |
| Terkla and Pagano (1993)             | Descriptive  | To discuss the use of a semantic differential research tool to measure an institution's image and examine the subsequent result, presenting the findings regarding various constituencies' perceptions.                                                                                                    |            |     |     | *   | *   |     |                    | USA Faculty, university managers and students (accepted applicants, current students and graduates) |
| Theus (1993)                         | Predictive   | To study higher education officials' perceptions of characteristics they believe publics consider to be important, as well as communication systems that influence their evaluations and ultimately their boundary-spanning behaviours.                                                                    | *          |     |     |     |     |     |                    | USA University managers                                                                             |
| Hayes (1993)                         | Prescriptive | To incentivate universities to apply image management.                                                                                                                                                                                                                                                     |            |     |     |     |     | *   |                    | -<br>-                                                                                              |
| Treadwell and Harrison (1994)        | Predictive   | To assess organizational images, index the degree of similarity between members' images, and evaluate relationships between image similarity, organizational commitment, and communication.                                                                                                                |            |     | *   | *   |     |     |                    | USA Current students, faculty and staff                                                             |
| Parameswaran and Glowacka (1995)     | Predictive   | To investigate the effect of overall university image on graduate evaluation.                                                                                                                                                                                                                              |            |     | *   |     |     |     |                    | USA Employers                                                                                       |
| Symes (1996)                         | Descriptive  | To identify the aspects that Australian universities emphasize in their promotional actions.                                                                                                                                                                                                               |            |     |     |     |     | *   |                    | Australia<br>-                                                                                      |
| Gioia and Thomas (1996)              | Predictive   | To investigate how top management teams in higher education institutions make sense of important issues [amongst them, identity and image] that affect strategic change in an academic institution.                                                                                                        |            |     |     |     |     | *   |                    | USA University managers                                                                             |
| Yavas and Shemwell (1996)            | Prescriptive | To introduce an untapped technique, correspondence analysis, as a tool for assessing a university's image vis-à-vis its closest competitors.                                                                                                                                                               |            |     |     |     |     | *   |                    | -<br>-                                                                                              |

| Authors                                        | Type of work | Topics                                                                                                                                                                                                                                                                                                                                                                     |                                           |   |   |   |   |   | Country Population                                             |
|------------------------------------------------|--------------|----------------------------------------------------------------------------------------------------------------------------------------------------------------------------------------------------------------------------------------------------------------------------------------------------------------------------------------------------------------------------|-------------------------------------------|---|---|---|---|---|----------------------------------------------------------------|
|                                                |              | Objectives *                                                                                                                                                                                                                                                                                                                                                               | Categories<br>(1) (2) (3) (4) (5) (6) (7) |   |   |   |   |   |                                                                |
| Landrum, Turrisi, and Harless (1999)           | Predictive   | To examine the relationships among the beliefs (cognitive variables) held by parents regarding a Higher Education institution and the orientation toward a given university.                                                                                                                                                                                               |                                           |   | * |   |   |   | USA<br>Parents                                                 |
| Karrh (2000)                                   | Prescriptive | To specify a decision-making framework for university marketing professionals based on the university image perceived by different segments and illustrate the use of that framework.                                                                                                                                                                                      |                                           |   |   | * |   | * | USA<br>Current students, graduates, parents, faculty and staff |
| Ivy (2001)                                     | Descriptive  | To determine how universities and technikons in both the UK and in South Africa use marketing to differentiate their images in the higher education market.                                                                                                                                                                                                                |                                           |   |   |   |   | * | United Kingdom and South Africa<br>University managers         |
| Nguyen and LeBlanc (2001)                      | Predictive   | To assess, in business education, the impact of institutional image and institutional reputation as well as their interaction effect on the student's retention decision.                                                                                                                                                                                                  |                                           |   | * |   |   |   | Canada<br>Current students                                     |
| Kazoleas, Yungwook, and Moffitt (2001)         | Exploratory  | To identify the "image/images" of the subject organization across residential or community populations and identify factors that related to image.                                                                                                                                                                                                                         | *                                         |   |   |   |   |   | USA<br>Society                                                 |
| Oplatka (2002)                                 | Descriptive  | To explore the messages through which low-stratified higher education institutions strive to increase their organizational image and "product" status and concurrently to attract prospective students.                                                                                                                                                                    |                                           |   |   |   |   | * | Israel<br>-                                                    |
| Beerli, Díaz Meneses, and Pérez Pérez (2002)   | Predictive   | To study the image of universities, with the aims of explaining the process of image forming by means of its different components, both in its cognitive and affective dimensions and of analysing its relationship with the students' satisfaction.                                                                                                                       | *                                         |   | * |   |   |   | Spain<br>Current students                                      |
| Arpan, Raney, and Zivnuska. (2003)             | Predictive   | To examine the construct of university image, to define the criteria that contribute to image ratings across several universities and to look for possible differences in the use of image criteria across different groups of evaluators.                                                                                                                                 | *                                         |   |   | * |   |   | USA<br>Current students and citizens (adults non-students)     |
| Çetin (2004)                                   | Descriptive  | To explore the prevalent marketing practices of four universities of Turkey and their utilization of marketing knowledge for image building and promoting academic programs.                                                                                                                                                                                               |                                           |   |   |   |   | * | Turkey<br>University managers                                  |
| Mixon, Lyon, and Beaty (2004)                  | Predictive   | To empirically assess the dilemma that national universities cannot attain a reputation for academic excellence if they maintain their religious identity.                                                                                                                                                                                                                 |                                           |   | * |   |   |   | USA<br>University managers                                     |
| Rindova, Williamson, Petkova, and Sever (2005) | Predictive   | To examine the system of relationships between the antecedents, dimensions, and consequences of business schools' reputations.                                                                                                                                                                                                                                             |                                           |   | * |   |   |   | USA<br>Employers                                               |
| Volkwein and Sweitzer (2006)                   | Exploratory  | To examine the variables that are the most strongly associated with institutional prestige and reputation and presents an exploratory model.                                                                                                                                                                                                                               |                                           |   | * |   |   |   | USA<br>-                                                       |
| Bosch, Venter, Han, and Boshoff (2006a)        | Predictive   | To analyse the brand identity variables and their impact on perceived brand image, leading to the assessment of stakeholder perceptions of the brand image of a university.                                                                                                                                                                                                |                                           |   | * |   |   |   | South Africa<br>Students and other stakeholders                |
| Bosch, Venter, Han, and Boshoff (2006b)        | Descriptive  | To report on possible disparities ("gaps") between the expectations linked to the Nelson Mandela Metropolitan University's brand image and the actual experience of this brand, as well as to offer recommendations whether dimensions, if any, of the Nelson Mandela Metropolitan University brand identity need to be addressed to enhance the image of the institution. |                                           |   |   |   | * |   | South Africa<br>Students and other stakeholders                |
| Alessandri, Yang, and Kinsey (2006)            | Predictive   | To explore the link between a university's visual identity and its reputation among the students.                                                                                                                                                                                                                                                                          |                                           |   | * |   |   |   | USA<br>Current students                                        |
| Vidaver-Cohen (2007)                           | Conceptual   | To propose a model that overcomes certain deficiencies presented by existing ways of measuring the reputation of business schools.                                                                                                                                                                                                                                         | *                                         | * |   |   |   |   | -<br>-                                                         |
| Baker and Brown (2007)                         | Exploratory  | To unpick the question of university 'choice' from the point of view of people who have undertaken higher education in the past two decades and explore some of the ideas, images and normative beliefs involved.                                                                                                                                                          |                                           |   | * |   |   |   | United Kingdom<br>Graduates                                    |
| Helgesen and Nettet (2007)                     | Predictive   | To look at the interplay between images and related constructs as student satisfaction, image of university college, image of study program and student loyalty.                                                                                                                                                                                                           |                                           |   | * |   |   |   | Norway<br>Current students                                     |
| Brunner and Boyer (2008)                       | Descriptive  | To examine how historically black colleges and universities are using their home pages to present images of themselves.                                                                                                                                                                                                                                                    |                                           |   |   |   |   | * | USA<br>-                                                       |

**A review of higher education image and reputation literature: Knowledge gaps and a research agenda**

| Authors                                   | Type of work | Topics                                                                                                                                                                                                                                                                                                                            |                                           |   |   |   |  |   | Country Population                                          |
|-------------------------------------------|--------------|-----------------------------------------------------------------------------------------------------------------------------------------------------------------------------------------------------------------------------------------------------------------------------------------------------------------------------------|-------------------------------------------|---|---|---|--|---|-------------------------------------------------------------|
|                                           |              | Objectives *                                                                                                                                                                                                                                                                                                                      | Categories<br>(1) (2) (3) (4) (5) (6) (7) |   |   |   |  |   |                                                             |
| Santiago, Carvalho, and Relva (2008)      | Descriptive  | To analyse the underlying social meaning of research and the way ‘images of science’ are built by universities on websites as an element that tries to make the difference in order to obtain competitive advantages in the institutional environment.                                                                            |                                           |   |   |   |  | * | Portugal<br>-                                               |
| Sung and Yang (2008)                      | Predictive   | To assess the impact of institutional image and image-related constructs on students’ supportive attitude.                                                                                                                                                                                                                        |                                           |   | * |   |  |   | South Korea<br>Students                                     |
| Yang, Alessandri, and Kinsey (2008)       | Exploratory  | To explore the link between reputation and relational quality in the context of student-university relationships, based on a perceptual analysis of the participants’ subjective views.                                                                                                                                           |                                           |   | * |   |  |   | USA<br>Students                                             |
| Tapper and Filippakou (2009)              | Descriptive  | To broaden our understanding of institutional reputation, presenting a more rounded view of what determines institutional reputation, with particular reference to the degree of importance of the factors from the perspective of established elite institutions.                                                                |                                           |   | * |   |  |   | -<br>-                                                      |
| Brown and Mazzarol (2009)                 | Exploratory  | To provide a clearer guide as to what are the strongest drivers of student satisfaction within a University setting, and whether a focus on elements such as the improvement of image, the provision of improved ‘hardware’ and ‘human’ customer services and so on is justified by the likelihood of increased customer loyalty. |                                           |   | * |   |  |   | Australia<br>Current students and graduates                 |
| Ressler and Abratt (2009)                 | Conceptual   | To explore the impact of university reputation on stakeholder intentions.                                                                                                                                                                                                                                                         |                                           |   | * |   |  |   | -<br>-                                                      |
| Luque and Del Barrio (2009)               | Predictive   | To propose a methodology by which to identify the dimensions making up the corporate image of a university and the relative importance of each of these for a particular target group, in this case the teaching and research staff.                                                                                              | *                                         | * |   |   |  |   | Spain<br>Faculty                                            |
| De Jager and Soontiens (2010)             | Descriptive  | To examine and compare criteria related to the importance of reputation and information to attract students in three different countries.                                                                                                                                                                                         |                                           |   |   | * |  |   | South Africa, Malaysia and Singapore<br>Current students    |
| Bastedo and Bowman (2010)                 | Predictive   | To explore the institutional effects of the U.S. News & World Report undergraduate rankings on the reputational assessments made by senior administrators at peer universities and liberal arts colleges.                                                                                                                         |                                           |   | * |   |  |   | USA<br>-                                                    |
| Duarte, Alves, and Raposo (2010)          | Exploratory  | To review the organizational image construct; explore the process of image formation and analyse the impact of the different source factors on university’s image.                                                                                                                                                                | *                                         |   |   |   |  |   | Portugal<br>Students                                        |
| Zaghloul, Hayajneh, and AlMarzouki (2010) | Exploratory  | To construct an instrument to identify the main dimensions determining the university’s image to assess in marketing purposes.                                                                                                                                                                                                    | *                                         | * |   |   |  |   | United Arab Emirates<br>Current students                    |
| Maric, Pavlin, and Ferjan (2010)          | Exploratory  | To know which factors influence “educational institution’s image” and how important is the influence of individual factors affecting “educational institution’s image”.                                                                                                                                                           | *                                         |   |   |   |  |   | Slovenia<br>Current students and ex-students                |
| Pampaloni (2010)                          | Predictive   | To look at how organizational image and the factors that contribute to it influence the decision-making process of new, first-year college students.                                                                                                                                                                              |                                           |   | * |   |  |   | USA<br>Students                                             |
| Alves and Raposo (2010)                   | Predictive   | To gather information as to the importance of image to students and its influence on student satisfaction and loyalty levels.                                                                                                                                                                                                     |                                           |   | * |   |  |   | Portugal<br>Students                                        |
| Brewer and Zhao (2010)                    | Predictive   | To explore the effect that a prospective pathway college affiliated to a large comprehensive university in Sydney may have on the university’s reputation. In particular, the association of reputation with preference for a pathway college, brand awareness and the opinion of college brand.                                  |                                           |   | * |   |  |   | Australia<br>Citizens                                       |
| Bakanauskas and Sontaite (2011)           | Exploratory  | To construct a measurement model of corporate reputation in higher education institutions from the perspective of their customers.                                                                                                                                                                                                |                                           |   | * |   |  |   | Lithuania<br>School leavers, current students and graduates |
| Polat (2011a)                             | Descriptive  | To determine the organizational image based on the views of university students                                                                                                                                                                                                                                                   |                                           |   |   | * |  |   | Turkey<br>Current students                                  |
| Polat (2011b)                             | Exploratory  | To determine the relationship between university students’ academic achievement and perceived organizational image.                                                                                                                                                                                                               |                                           |   | * |   |  |   | Turkey<br>Current students                                  |
| Bowman and Bastedo (2011)                 | Predictive   | To examine the impact of rankings on the reputational assessments made by insiders in the higher education field.                                                                                                                                                                                                                 |                                           |   | * |   |  |   | -<br>-                                                      |

| Authors                                                                                        | Type of work | Topics                                                                                                                                                                                                                                                                                                                                                  |            |     |     |     |     |     | Country Population                        |
|------------------------------------------------------------------------------------------------|--------------|---------------------------------------------------------------------------------------------------------------------------------------------------------------------------------------------------------------------------------------------------------------------------------------------------------------------------------------------------------|------------|-----|-----|-----|-----|-----|-------------------------------------------|
|                                                                                                |              | Objectives *                                                                                                                                                                                                                                                                                                                                            | Categories |     |     |     |     |     |                                           |
|                                                                                                |              |                                                                                                                                                                                                                                                                                                                                                         | (1)        | (2) | (3) | (4) | (5) | (6) | (7)                                       |
| Draelants (2012)                                                                               | Predictive   | To explore the role played by the prestigious image of the French grandes écoles in their attractiveness, and its related problems, as analysed retrospectively by the students who succeeded in joining these elite institutions.                                                                                                                      |            |     | *   |     |     |     | France Students                           |
| Matherly (2012)                                                                                | Predictive   | To model the decision criteria used by students in selecting a university, determine the factors that influence the image of a university, and ultimately, predict intention to enrol.                                                                                                                                                                  | *          |     | *   |     |     |     | Not specified Various stakeholders        |
| Kheiry, Rad, and Asgari (2012)                                                                 | Predictive   | To study the significance of intellectual image of university on students and its effect on satisfaction and degree of their loyalty.                                                                                                                                                                                                                   |            |     | *   |     |     |     | Iran Students                             |
| Steiner, Sundström, and Sammalisto (2013)                                                      | Conceptual   | To develop a multidimensional model, making it possible to identify and analyse both internal and external factors that have an influence on university identity and reputation.                                                                                                                                                                        |            |     | *   |     |     |     | -<br>-                                    |
| Delgado-Márquez, Escudero-Torres, and Hurtado-Torres (2013)                                    | Predictive   | To investigate whether institutional performance in internationalization translates into an improved reputation in top universities.                                                                                                                                                                                                                    |            |     | *   |     |     |     | -<br>-                                    |
| Finch, McDonald, and Staple (2013)                                                             | Predictive   | To explore the reputational attributes of three different categories of post-secondary institutions in Canada.                                                                                                                                                                                                                                          |            |     |     |     | *   |     | Canada Employers                          |
| Tamuliene and Murzaite (2013)                                                                  | Predictive   | To analyse the influence of higher education image on students' loyalty.                                                                                                                                                                                                                                                                                |            |     | *   |     |     |     | Lithuania Students and ex-students        |
| Wilkins and Huisman (2013)                                                                     | Predictive   | To identify the criteria used by prospective students to evaluate the images they hold of international branch campuses and to investigate the impact of these assessments on students' attachment to institutions.                                                                                                                                     | *          |     | *   |     |     |     | United Arab Emirates Prospective students |
| Chen and Chen (2014)                                                                           | Predictive   | To examine the relationship between the brand image students have of their colleges and their satisfaction and lifetime customer value.                                                                                                                                                                                                                 |            |     | *   |     |     |     | Taiwan Students                           |
| Munisamy, Mohd Jaafar, and Nagaraj (2014)                                                      | Predictive   | To investigate the reasons for students to pursue higher education and identify the key factors that influence students' decisions about their choice of institution [amongst them, the institution's reputation].                                                                                                                                      |            |     | *   |     |     |     | Malaysia Students                         |
| Chen (2015)                                                                                    | Predictive   | To investigate the interrelationships among service recovery, relationship quality, and brand image in Taiwanese higher education institutions.                                                                                                                                                                                                         |            |     | *   |     |     |     | Taiwan Students                           |
| Wilkins and Huisman (2015)                                                                     | Exploratory  | To explore how international students form images of international branch campuses (identifying the sources of information and other influences).                                                                                                                                                                                                       | *          |     |     |     |     |     | United Arab Emirates Prospective students |
| Aghaz, Hashemi, and Sharifi Atashgah (2015)                                                    | Predictive   | To examine the priorities of different factors contributing to university image among postgraduate students; to investigate the postgraduate students' perceptions of university image for current practices (as is) and ideal values (should be); and to examine the perceived university image impact on postgraduate students' organizational trust. | *          |     | *   |     | *   |     | Iran Postgraduate students                |
| Drydakis (2015)                                                                                | Predictive   | To estimate whether job applicants who have obtained a Bachelor of Science in economics from 15 UK universities face different labour market prospects.                                                                                                                                                                                                 |            |     | *   |     |     |     | United Kingdom Graduates                  |
| (1) Identification of the aspects/dimensions/facets that make up the image/reputation of HEIs. |              |                                                                                                                                                                                                                                                                                                                                                         |            |     |     |     |     |     |                                           |
| (2) Proposal of a measurement model for the image/reputation of HEIs.                          |              |                                                                                                                                                                                                                                                                                                                                                         |            |     |     |     |     |     |                                           |
| (3) Relation of the image/reputation of HEIs with other variables.                             |              |                                                                                                                                                                                                                                                                                                                                                         |            |     |     |     |     |     |                                           |
| (4) Comparative analysis of various HEI stakeholders' perspectives.                            |              |                                                                                                                                                                                                                                                                                                                                                         |            |     |     |     |     |     |                                           |
| (5) Evaluation/measurement of the image/reputation of specific HEIs.                           |              |                                                                                                                                                                                                                                                                                                                                                         |            |     |     |     |     |     |                                           |
| (6) Proposal of orientations for managing the image/reputation of HEIs.                        |              |                                                                                                                                                                                                                                                                                                                                                         |            |     |     |     |     |     |                                           |
| (7) Description of forms of action of specific HEIs in terms of image/reputation management.   |              |                                                                                                                                                                                                                                                                                                                                                         |            |     |     |     |     |     |                                           |
| * When possible the authors' original wording has been reflected.                              |              |                                                                                                                                                                                                                                                                                                                                                         |            |     |     |     |     |     |                                           |

## REFERENCES

- Aghaz, A., Hashemi, A., & Sharifi Atashgah, M.S. (2015). Factors contributing to university image: The postgraduate students' points of view. *Journal of Marketing for Higher Education*, 25(1), 104-126.
- Alessandri, S.W., Yang, S.U., & Kinsey, D.F. (2006). An integrative approach to university visual identity and reputation. *Corporate Reputation Review*, 9(4), 258-270.
- Alexander, D.C. (1971). A construct of the image and a method of measurement. *Journal of Communication*, 21(2), 170-178.
- Alves, H., & Raposo, M. (2010). The influence of university image on student behaviour. *International Journal of Educational Management*, 24(1), 73-85.
- Arpan, L.M., Raney, A.A., & Zivnuska, S. (2003). A cognitive approach to understanding university image. *Corporate Communications: An International Journal*, 8(2), 97-113.
- Bakanauskas, A., & Sontaite, M. (2011). Measurement model of corporate reputation at higher education institutions: Customers' perspective. *Management of Organizations: Systematic Research*, 59(1), 115-130.
- Baker, S., & Brown, B. (2007). Images of excellence: Constructions of institutional prestige and reflections in the university choice process. *British Journal of Sociology of Education*, 28(3), 377-391.
- Bardo, J.W., Ross, R.H., & Headley, E.L. (1990). Measuring alumni's image of a university. *Journal for Higher Education Management*, 6(1), 29-44.
- Bastedo, M.N., & Bowman, N.A. (2010). U.S. News & World Report college rankings: Modeling institutional effects on organizational reputation. *American Journal of Education*, 116(2), 163-183.
- Beerli, A., Díaz Meneses, G., & Pérez Pérez, P. (2002). The configuration of the university image and its relationship with the satisfaction of students. *Journal of Educational Administration*, 40(5), 486-505.
- Bosch, J., Venter, E., Han, Y., & Boshoff, C. (2006a). The impact of brand identity on the perceived brand image of a merged higher education institution: Part one. *Management Dynamics*, 15(2), 10-30.
- Bosch, J., Venter, E., Han, Y., & Boshoff, C. (2006b). The impact of brand identity on the perceived brand image of a merged higher education institution: Part two. *Management Dynamics*, 15(3), 36-47.
- Bowman, N.A., & Bastedo, M.N. (2011). Anchoring effects in world university rankings: Exploring biases in reputation scores. *Higher Education*, 61(4), 431-444.
- Brewer, A., & Zhao, J. (2010). The impact of a pathway college on reputation and brand awareness for its affiliated university in Sydney. *International Journal of Educational Management*, 24(1), 34-47.
- Brown, R., & Mazzarol, T. (2009). The importance of institutional image to student satisfaction and loyalty within higher education. *Higher Education*, 58(1), 81-95.
- Brunner, B.R., & Boyer, L. (2008). Internet presence and historically black colleges and universities: Protecting their images on the World Wide Web? *Public Relations Review*, 34(1), 80-82.
- Çetin, R. (2004). Planning and implementing institutional image and promoting academic programs in higher education. *Journal of Marketing for Higher Education*, 13(1/2), 57-75.
- Chen, C.F., & Chen, C.T. (2014). The effect of higher education brand images on satisfaction and lifetime value from students' viewpoint. *Anthropologist*, 17(1), 137-145.
- Chen, Y.C. (2015). A study of the interrelationships among service recovery, relationship quality, and brand image in higher education industries. *The Asia-Pacific Education Researcher*, 24(1), 81-89.
- Cochran, T.R., & Hengstler, D.D. (1983). Assessing the image of a university. *Journal of College Admissions*, 27(4), 29-34.
- Davies, J.L., & Melchiori, G.S. (1982). Developing the image and public reputation of universities: The managerial process. *International Journal of Institutional Management in Higher Education*, 6(2), 87-108.
- De Jager, J.W., & Soontiens, W. (2010). Reputation and information drivers in student recruitment: Comparing South African, Singaporean and Malaysian Tertiary Education. *African Journal of Business Management*, 4(13), 3062-3069.
- Delgado-Márquez, B.L., Escudero-Torres, M.Á., & Hurtado-Torres, N.E. (2013). Being highly internationalised strengthens your reputation: An empirical investigation of top higher education institutions. *Higher Education*, 66(5), 619-633.
- Draelants, H. (2012). A prestigious image: Advantage or obstacle in attracting candidates to French elite higher education? *Research Papers in Education*, 27(5), 555-579.
- Drydak, N. (2015). Economics applicants in the UK labour market: University reputation and employment outcomes. *International Journal of Manpower*, 36(3), 296-333.
- Duarte, P.O., Alves, H., & Raposo, M. (2010). Understanding university image: A structural equation model approach. *International Review on Public and Nonprofit Marketing*, 7(1), 21-36.
- Finch, D., McDonald, S., & Staple, J. (2013). Reputational interdependence: An examination of category reputation in higher education. *Journal of Marketing for Higher Education*, 23(1), 34-61.
- Gioia, D.A., & Thomas, J.B. (1996). Identity, image, and issue interpretation: Sensemaking during strategic change in Academia. *Administrative Science Quarterly*, 41(3), 370-403.
- Hayes, T.J. (1993). Image and the university. *Journal of Marketing for Higher Education*, 4(1-2), 423-425.
- Helgesen, Ø., & Nettet, E. (2007). Images, satisfaction and antecedents: Drivers of student loyalty? A case study of a

Lafuente-Ruiz-de-Sabando, A., Zorrilla, P. and Forcada, J.

**A review of higher education image and reputation literature: Knowledge gaps and a research agenda**

- Norwegian university college. *Corporate Reputation Review*, 10(1), 38-59.
- Ivy, J. (2001). Higher education institution image: A correspondence analysis approach. *International Journal of Educational Management*, 15(6), 276-282.
- Karrh, J.A. (2000). Evaluating belief strength and consistency in the assessment of university image. *Journal of Marketing for Higher Education*, 10(2), 1-9.
- Kazoleas, D., Yungwook, K., & Moffitt, M.A. (2001). Institutional image: A case study. *Corporate Communications: An International Journal*, 6(4), 205-216.
- Kheiry, B., Rad, B.M., & Asgari, O. (2012). University intellectual image impact on satisfaction and loyalty of students (Tehran selected universities). *African Journal of Business Management*, 6(37), 10205-10211.
- Krampf, R.F., & Heinlein, A.C. (1981). Developing marketing strategies and tactics in higher education through target market research. *Decision Sciences*, 12(2), 175-193.
- Landrum, R.E., Turrissi, R., & Harless, C. (1999). University image: The benefits of assessment and modeling. *Journal of Marketing for Higher Education*, 9(1), 53-68.
- Luque, T., & Del Barrio, S. (2009). Modelling university image: The teaching staff viewpoint. *Public Relations Review*, 35(3), 325-327.
- Maric, M., Pavlin, J., & Ferjan, M. (2010). Educational institution's image: A case study. *Organizacija: Journal of Management, Informatics and Human Resources*, 43(2), 58-65.
- Matherly, L.L. (2012). A causal model predicting student intention to enrol moderated by university image: Using strategic management to create competitive advantage in higher education. *International Journal of Management in Education*, 6(1-2), 38-55.
- Milo, K., Edson, K., & Mceuen, V. (1989). The impact of negative publicity on institutional reputation and student college choice. *College and University*, 64(3), 237-245.
- Mixon, S.L., Lyon, L., & Beaty, M.D. (2004). Secularization and national universities: The effect of religious identity on academic reputation. *The Journal of Higher Education*, 75(4), 400-419.
- Munisamy, S., Mohd Jaafar, N., & Nagaraj, S. (2014). Does reputation matter? Case study of undergraduate choice at a premier university. *The Asia-Pacific Education Researcher*, 23(3), 451-462.
- Nguyen, N., & LeBlanc, G. (2001). Image and reputation of higher education institutions in students' retention decisions. *International Journal of Educational Management*, 15(6), 303-311.
- Oplatka, I. (2002). Implicit contradictions in public messages of "low-stratified" HE institutions: The case of Israeli teacher training colleges. *International Journal of Educational Management*, 16(5), 248-256.
- Pampaloni, A.M. (2010). The influence of organizational image on college selection: What students seek in institutions of higher education. *Journal of Marketing for Higher Education*, 20(1), 19-48.
- Parameswaran, R., & Glowacka, A.E. (1995). University image: An information processing perspective. *Journal of Marketing for Higher Education*, 6(2), 41-56.
- Polat, S. (2011a). Organizational image of Kocaeli University for university students. *Egitim ve Bilim / Education and Science*, 36(160), 105-119.
- Polat, S. (2011b). The relationship between university students' academic achievement and perceived organizational image. *Educational Sciences: Theory and Practice*, 11(1), 257-262.
- Reid, W.A. (1973). Applicants' images of universities. *Educational Review*, 26(1), 16-29.
- Ressler, J., & Abratt, R. (2009). Assessing the impact of university reputation on stakeholder intentions. *Journal of General Management*, 35(1), 35-45.
- Rindova, V.P., Williamson, I.O., Petkova, A.P., & Sever, J.M. (2005). Being good or being known: An empirical examination of the dimensions, antecedents, and consequences of organizational reputation. *The Academy of Management Journal*, 48(6), 1033-1049.
- Santiago, R., Carvalho, T., & Relva, R. (2008). Research and the universities' image. *European Journal of Education*, 43(4), 495-512.
- Steiner, L., Sundström, A.C., & Sammalisto, K. (2013). An analytical model for university identity and reputation strategy work. *Higher Education*, 65(4), 401-415.
- Struckman-Johnson, C., & Kinsley, S. (1985). Assessment and comparison of college image among high school seniors, college students, and alumni. *College and University*, 60(4), 316-327.
- Sung, M., & Yang, S.U. (2008). Toward the model of university image: The influence of brand personality, external prestige, and reputation. *Journal of Public Relations Research*, 20(4), 357-376.
- Symes, C. (1996). Selling futures: A new image for Australian universities? *Studies in Higher Education*, 21(2), 133-147.
- Tamuliene, V., & Murzaite, R. (2013). The influence of higher education image on students' loyalty in Lithuania. *Transformation in Business and Economics*, 12(2), 196-214.
- Tapper, T., & Filippakou, O. (2009). The world-class league tables and the sustaining of international reputations in higher education. *Journal of Higher Education Policy and Management*, 31(1), 55-66.
- Terkla, D.G., & Pagano, M.F. (1993). Understanding institutional image. *Research in Higher Education*, 34(1), 11-22.
- Theus, K.T. (1993). Academic reputations: The process of formation and decay. *Public Relations Review*, 19(3), 277-291.
- Townsend, B.K. (1986). Preferred directions and images for the community college: A view from inside. *Research in Higher Education*, 25(4), 316-327.

Lafuente-Ruiz-de-Sabando, A., Zorrilla, P. and Forcada, J.

**A review of higher education image and reputation literature: Knowledge gaps and a research agenda**

- Treadwell, D.F., & Harrison, T.M. (1994). Conceptualizing and assessing organizational image: Model images, commitment and communication. *Communication Monographs*, 61, 63-85.
- Vidaver-Cohen, D. (2007). Reputation beyond the rankings: A conceptual framework for business school research. *Corporate Reputation Review*, 10(4), 278-304.
- Volkwein, J.F., & Sweitzer, K.V. (2006). Institutional prestige and reputation among research universities and liberal arts colleges. *Research in Higher Education*, 47(2), 129-148.
- Weissman, J. (1990). Institutional image assessment and modification in colleges and universities. *Journal for Higher Education Management*, 6(1), 65-75.
- Wilkins, S., & Huisman, J. (2013). Student evaluation of university image attractiveness and its impact on student attachment to international branch campuses. *Journal of Studies in International Education*, 17(5), 607-623.
- Wilkins, S., & Huisman, J. (2015). Factors affecting university image formation among prospective higher education students: The case of international branch campuses. *Studies in Higher Education*, 40(7), 1256-1272.
- Yang, S.U., Alessandri, S.W., & Kinsey, D.F. (2008). An integrative analysis of reputation and relational quality: A study of university-student relationships. *Journal of Marketing for Higher Education*, 18(2), 145-170.
- Yavas, U., & Shemwell, D.J. (1996). Graphical representation of university image: A correspondence analysis. *Journal of Marketing for Higher Education*, 7(2), 75-84.
- Zaghloul, A.Z., Hayajneh, Y.A., & AlMarzouki, A. (2010). Factor analysis for an institutional image instrument. *International Review on Public and Nonprofit Marketing*, 7(2), 157-166.
